# Supplementary material
Source: publisher site journal article supplement (https://www.dovepress.com/article/386563)
Supplement: Supplementary file 1 [file get_supplementary_file.php]

Researchers and collaborators from the hospitals participating in the national hip fracture registry in Spain (RNFC)

Hospital Universitario de Guadalajara. Castilla-La Mancha: Sheila Pena Salvador, Juan Rodríguez Solís, Teresa Pareja Sierra. Hospital Regional Universitario de Málaga. Andalucía: Verónica Pérez Del Río. Hospital Universitario de Cabueñes. Gijón-Asturias: María Luisa Taboada Martínez. Hospital Central de la Defensa Gómez Ulla. Madrid: Raquel Vállez Romero. Hospital Clínico Universitario de Santiago. Galicia: José Ramón Caeiro, Eduardo del Río Pombo, María Otero Fernández y Mª Carmen Ruanova Quintas. Hospital Clínico Universitario Virgen de la Arrixaca. Murcia: Juan Dionisio Avilés y Elena Martínez Moreno. Hospital Universitario Cruces. Barakaldo-País Vasco: Borja Villarejo Fernández, Esteban Javier Aragon Achig, Rocio Prieto Martin, Nerea Hernández González y Josu Merino Pérez. Hospital Nuestra Señora de Sonsoles.Ávila: Flavia Lorena Hunicken y Natalia Sánchez Hernández. Hospital Universitario Donostia. Guipúzcoa-País Vasco: Gaspar de la Herrán, Irene Corcuera, Imanol Gabarain, Oiane Alda, Ainhoa Jauregui, Nahikari Nunes y Carolina Garikano. HLA Clínica Vistahermosa. Alicante-Valencia: Javier Sanz Reig y Jesús Más Martínez. Hospital Clínico Universitario Valencia: Rosana Arnau Masanet y Amelia Pascual Ramírez. Hospital de la Santa Creu. Tortosa-Tarragona. Barcelona-Cataluña: Jordi Martin Marcuello, Alessio Rodolico y Álvaro Santos Gutiérrez. Hospital Virgen del Puerto. Plasencia-Cáceres. Extremadura: Estela Villalba Lancho, Guadalupe Lozano Pino, Jean Carlo Heredia Pons, Antonio Rodríguez Rosa y Raquel Ortés Gómez. Fundación Privada Hospital Asil Granollers. Cataluña: Nuria Muñoz Pérez y M. Victoria Farré Mercadé. Hospital Universitario del Sureste. Arganda del Rey-Madrid: Ángela F. de Tena Fontaneda y Miriam Rosa Ramos Cortés. Consorci Sanitari de Terrassa – Hospital de Terrassa. Barcelona-Cataluña: Leonor Cuadra Llopart, Georgina Cerda Mas, Laura Zaera y Pedro Zubeldía. Complejo Hospitalario Universitario de Cartagena. Murcia: Inés Gil Broceño y Carmen Alcaraz López. Complejo Asistencial Universitario de León. Castilla y León: Sonia Jiménez Mola, Javier Idoate Gil y Paula Fernández García. Hospital Universitario de Galdakao-Usansolo. Bizkaia-País Vasco: Isidoro Calvo Lorenzo, Kattalin Iza San Juan, Yanire Rojo Maza, Uxue Agirregoitia Enzunza, Haizea Bollar Eiguren, Jorge Suárez Rodríguez, Ane Larrazábal Maruri, Sonsoles Pastor García, Patricia Jiménez Tellería, Andrea Vea Val, Xabier Uriarte Larrabeiti y Xabier Jiménez Urrutia. Hospital Clínico Universitario de Valladolid-Castilla y León: Maria Carmen Cervera Díaz, Virginia García Virto, Elvira Mateos Álvarez, Adela Pereda Manso y Abel Ganso Pérez. Hospital Universitario Fundación Alcorcón. Madrid: Pilar Sáez López, Beatriz Pérdomo Ramírez, Victoria Sebastian Pérez, Pablo de Guinea Luengo, Miguel Ángel Marín Aguado, Álvaro López Hualda, María Angeles Pizarro Jaraiz, Pilar Martínez Velasco, Leandro Valdez Disla, Isabel González Anglada y Javier Martínez Martín. Hospital Nuestra Señora de Candelaria. Santa Cruz de Tenerife-Canarias: Magali González-Colaço Harmand, Alicia Tejera Concepción, Teresa Méndez Siluto, Raquel Bachiller Caño, Caridad Martínez Torralba, Adela Dávila Jérez, Luz Delgado Domínguez y Claudia Arango Salazar. Hospital Universitario Ramón y Cajal. Madrid: Luisa Alejandra Hernández Sánchez, Manuel Vicente Mejía Ramírez de Arellano, Blanca Mur Molina y Erick Arturo Rodríguez Espeso. Hospital Clínico San Carlos. Madrid: Jesús Mora Fernández y Ana María Moreno Morillo. Hospital Valle de los Pedroches. Pozoblanco. Córdoba-Andalucía: Manuel Mesa Ramos, Pilar Márquez deTorres, Ana Barbancho Barbancho, Gloria Fabios Blanco, Diana Carretero Dios, Antonio José Jiménez Vílchez, Natalia Angélica Barahona Garibello, María José Justicia Castro, Pilar Sánchez Pozuelo, David Olmo Romero, María Teresa Alameda Pozuelo, Inmaculada Boj Sánchez y Francisco Mesa Ramos. Hospital Nuestra Señora de Gracia. Zaragoza-Aragón: Elisa Lasala Hernández, Nora Molina Torres, Ana Sanjoaquín Romero, Julia Castillo García, Natalia Rodriguez Osto y Nerea Gómez Galardón. Hospital Universitario Infanta Sofía. San Sebastián de los Reyes-Madrid: Marta Neira Álvarez, Ana Hurtado Ortega, Rubén Herreros Valdepeñas, Guillermo Carretero Cristobal, Carlos Fagundez García, Carmen Vargas Almeida y Fernando Zorita Arroyo. Hospital Universitario de Basurto. Vizcaya-País Vasco: Unai García De Cortázar Antolín, Mirentxu Arrieta Salinas, Daniel Escobar Sánchez, Estibaliz Castrillo Carrera, Josu Lauzirika Uranga, Mar Abeal López, Ainara Izaguirre Zurinaga, Javier Hoyos Cillero, Cesar García Puertas, Arkaitz Lara Quintana, Borja Cuevas Martínez, Julia Isabel Martino Quintela, Andrea Dominguez Ibarrola, Idoia Villamor García, Ander Moso Bilbao, Andrea Calvo Pariente, Eduerne Aguinaco Ortiz De Villalba, Andrea Macicior Arostegi y Jone Lapuente Ocamica. Hospital Universitario Miguel Servet. Zaragoza-Aragón: Juan Pablo Ortega Lahuerta, Marta Eugenia Infantes Morales, Alejandra García Hérnandez y Leticia Oliden Gutiérrez. Hospital Comarcal de Vinarós. Castellón-Valencia: Samantha Santana Zorrilla, Miguel Angel Valero Queralt, Javier Santillana Ruíz, Maite Ávila Gellida, Marta Hernández Herrero, José Luis Martínez Vergara, Carlos Honrubia Escribano, Clara Esteban Tudela, Tamara Aparisi Miralles y Camilo Sanz Zamudio. Hospital Universitario de Móstoles. Madrid: John Mitchel Omonte Guzman, Maria Pilar Rodríguez Sanjuan, Sonia Nieto Colino, Fco.Javier Cid Abasolo, Agustin Prieto Sanchez e Inmaculada Boyano Sanchez. Hospital Universitario Dr. Peset. Valencia: Carles Martinez Perez yJosé Antonio Blas Dobón. Hospital Universitario Puerta de Hierro. Majadahonda-Madrid: Cristina Bermejo Boixareu, Gema Piña Delgado, Jesús Campo Loarte, Macarena Díaz de Bustamante De Ussía, Armando Pardo Gómez, Samuel González, Ainhoa Guijarro, Iluminada Martín García, Fernando Segismundo Jañez. Hospital Reina Sofía. Tudela-Navarra: Sara Magaña Orta, Noemi Borobia Rodriguez, Julián Díaz Jiménez, Aitziber Echeverría Echeverría, Ignacio Gómez Ochoa, Mª Rosa González Panisello, Isabel Irigoyen Urroz , Eva Marta Miñana Barrios, Erika Navarro Ruiz, Sara Pinilla Baigorri, Jon Ros Añon, María Sanz Galvez, Mª Cruz Imaz Prim, Patricia Floristán Resa, Lucas Eza Moreno, Maite Fauste Angos y Soledad Moreno García. Hospital García Orcoyen de Estella-Lizarra. Navarra: Javier Martínez de Morentin Garraza, Francisco Artázcoz Iribarren, Raquel Romero Campuzano, José Ramón Varela Egocheaga, Ainhoa Gordillo Santesteban, Oskia Pena Goñi, Leyre Muñoa Oteiza, Lucas Arbeloa Gutierrez, Arturo Ávila Vicioso yJorge Cunchillos Pascual. Hospital Comarcal Monforte de Lemos. Galicia: Álvaro Marchán López, Javier Cambón Cotelo, Víctor Quevedo Vila yJosé López Castro. Hospital Universitario Marqués de Valdecilla. Cantabria: Zolio Yusta Escudero, Mª Jesús Sanz-Aranguez Avila, Bárbara Pérez Pena, Jesús Pérez del Molino Martín y Begoña Busta Vallina. Hospital Sociosanitario Francolí. Tarragona-Cataluña: Eugènia Sopena Bert. Hospital Vital Álvarez-Buylla. Mieres-Asturias: Marta Alonso Álvarez y Aroa Roces Fernández. Hospital Universitario Severo Ochoa. Leganés. Madrid: María Jesús Molina Hernández. Hospital General Obispo Polanco. Teruel. Aragón: Ángel Castro Sauras, María Royo Agustín, Pilar Muniesa Herrero, Alejandro Urgel Granados, Miguel Ranera García, María Teresa Espallargas Doñate, Agustín Rillo Lázaro, Vicente Sánchez Ramos, José Adolfo Blanco Llorca, Jorge García Fuentes, Alberto Planas Gil y Natalia Barberena Turrau. Hospital Universitario Principe de Asturias. Alcalá de Henares. Madrid: Gregorio Jiménez Díaz, Natalia González García, María Madrigal López, Fiorella Milagros Quinte Yarcuri y María Asenjo Cambra. Hospital General de Segovia. Segovia: Angélica Muñoz Pascual, M. Teresa Guerrero Díaz, M. Cruz Macias Montero, Elena Ridruejo Gutiérrez Cámara, Alberto Núñez Sanz, Inmaculada Gómez Pérez, Elodia Bernabeu Serrano, Noelia Alonso García, Isabel Mota San José, Natalia del Álamo de Andrés y Carmen Seoane Rodríguez. Complejo Hospitalario Universitario de Albacete. Castilla La Mancha: Amalia Navarro Martínez, María Cortes Avilés Martínez, Virginia Parra Ramos,Cristina Rosa Felipe, María Lourdes Sáez Méndez, Francisco Medrano, González, Joaquín Alfaro Micó, Sergio Losa Palacios, Esther Ladrón de Guevara CórcolesMaría Carmen Viejobueno Mayordomo, Ainara Acherandio de Nova, Noelia Ramayo Díaz y Leticia García Sánchez. Hospital Comarcal de Alto Deba. Guipúzcoa-País Vasco: Uxue Barrena, Amaia Santxez e Iñigo Etxebarria. Hospital de Manises. Valencia: José S. Barreda Puchades, Marta Ribelles Férez y Cristina Rocio Espejo. Centre Sociosanitari El Carme. Badalona-Cataluña: José Manuel Cancio Trujillo y José Luis Rodríguez García. Hospital Universitario Fundación Jiménez Díaz. Madrid: Ana Isabel Hórmigo Sánchez, María Almudena Milán Vegas, Myriam Rodríguez Couso, Marta García Salmones Fragoso, Virginia Ruiz Almarza, Esther Lueje Alonso, Javier Sánchez Martin y Cristina Trenado Salan. Hospital Universitario de Getafe. Madrid: Myriam Valdés Aragonés y María Isabel Tornero López. Hospital General Universitario Gregorio Marañón. Madrid: Virginia Mendoza Moreno y Nuria Montero. Hospital General de Villalba. Collado Villalba-Madrid: Verónica Martín López. Hospital El Pilar. Barcelona-Cataluña: Silvia Comas. Hospital Universitario Mútua de Terrassa. Barcelona-Cataluña: Laura Puertas, Pablo Castillón, Cristina Estrada, Olga Gómez, Irene Omiste, Laura Rey y Carlos García. Hospital de Henares. Madrid: Sonia Bartolomé. Hospital Virgen de la Luz. Cuenca-Castilla-La Mancha: María Teresa Cuerda Clares, Laura Jiménez de la Cruz y Laura Martínez Díaz. Hospital Universitario Son Llàtzer. Palma de Mallorca-Baleares: Isabel María Ruiz Hernández, Juan Antonio Toribio Pons, Tomás Pujol Oliver, María Muñoz González, Marina Sabater Jofre, Denise González Acuña y Jaime Álvarez Lastra.Hospital Universitario San Agustín. Avilés-Asturias: Rocío Martínez Gutiérrez. Hospital de Viladecans. Cataluña: Diana de la Fuente de Dios Magdalena Sistac Robles. Hospital San Juan Dios de León. Castilla y León: Encarnación M. Martín Pérez y Silvia Fidalgo García. Hospital Universitario Infanta Leonor. Madrid: Tania Indira Sánchez Sánchez y Fátima Brañas. Hospital de la Cruz Roja. Gijón-Asturias: Laura Pellitero Blanco y Marian Rodríguez Piñera.
